# Supplementary material
Source: HighWire-hosted journal article supplement (http://ajnr-stage2.highwire.org/highwire/filestream/76372/field_highwire_adjunct_files/0/20-00123.pdf)
Supplement: 20-00123.pdf [file 20-00123.pdf]

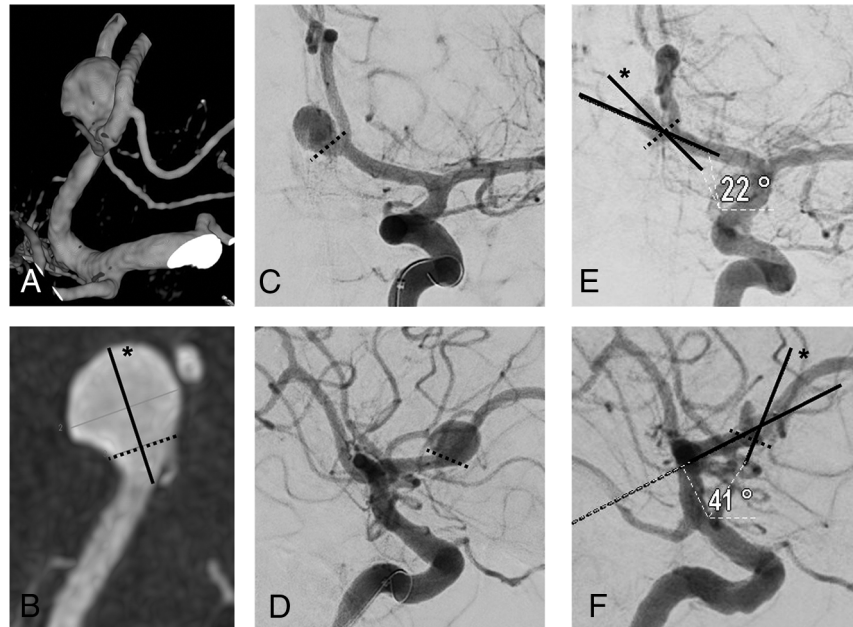

**ON-LINE FIGURE.** Measurements of the aneurysm axis, WEB axis, and angle of deviation in an incidental AcomA aneurysm. *A*, 3D volume-rendering of the aneurysm. *B*, Detailed view of the aneurysm on flat panel CT. *Black line* indicates the aneurysm axis; the *dotted line* marks the aneurysm neck plane. Note the *asterisk* indicating the aneurysm axis. *C*, Working projection (direct view) of the aneurysm prior to treatment. *Dotted line* marks the aneurysm neck plane. *D*, Perpendicular view of the aneurysm prior to treatment. *Dotted line* marks the aneurysm neck plane. *E*, Deviation angle between the aneurysm and WEB axis in a posttreatment working projection. *Continuous lines* indicate the aneurysm axis and WEB axis; the *dotted line* marks the aneurysm neck plane. Note the *asterisk* indicating the aneurysm axis. *F*, Deviation angle between aneurysm and WEB axis in posttreatment perpendicular view. *Continuous lines* indicate the aneurysm axis and WEB axis; the *dotted line* marks the aneurysm neck plane. Note the *asterisk* indicating the aneurysm axis.
